# Supplementary material for: Identification of BACH1-IT2-miR-4786-Siglec-15 immune suppressive axis in bladder cancer
Source: Springer Nature journal article supplement (doi:10.1186/s12885-024-12061-8), 2024-03-11

Figure 2F

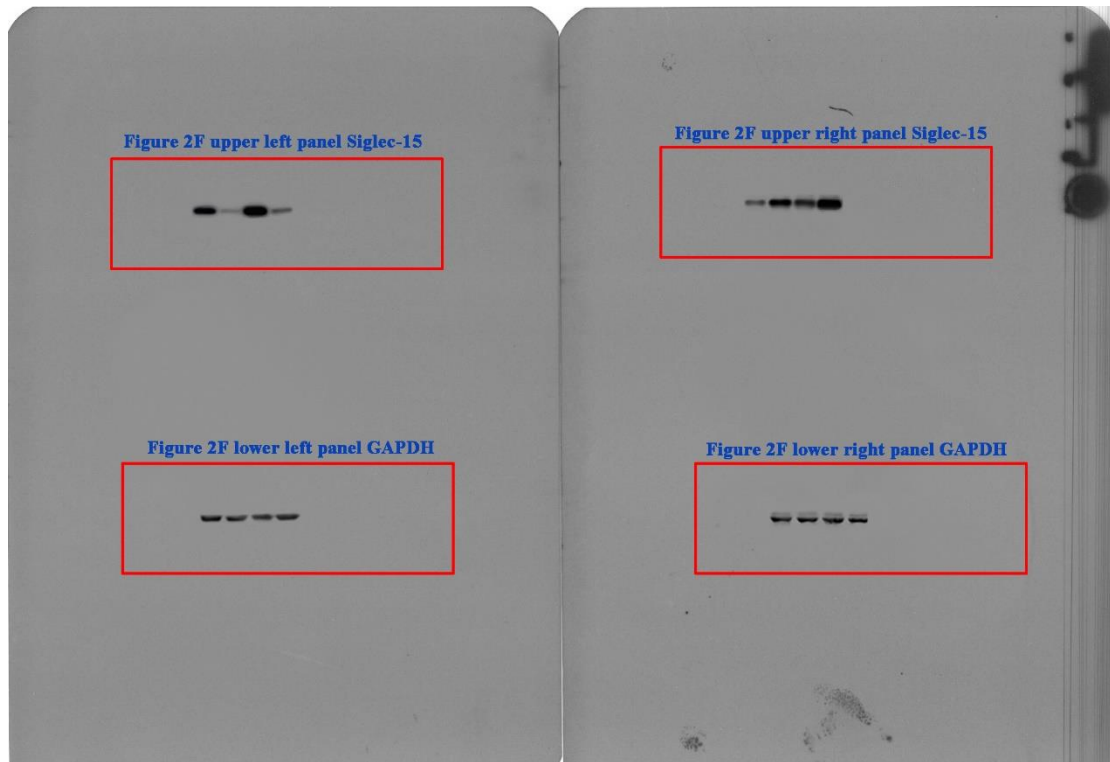

Figure 3C left panel

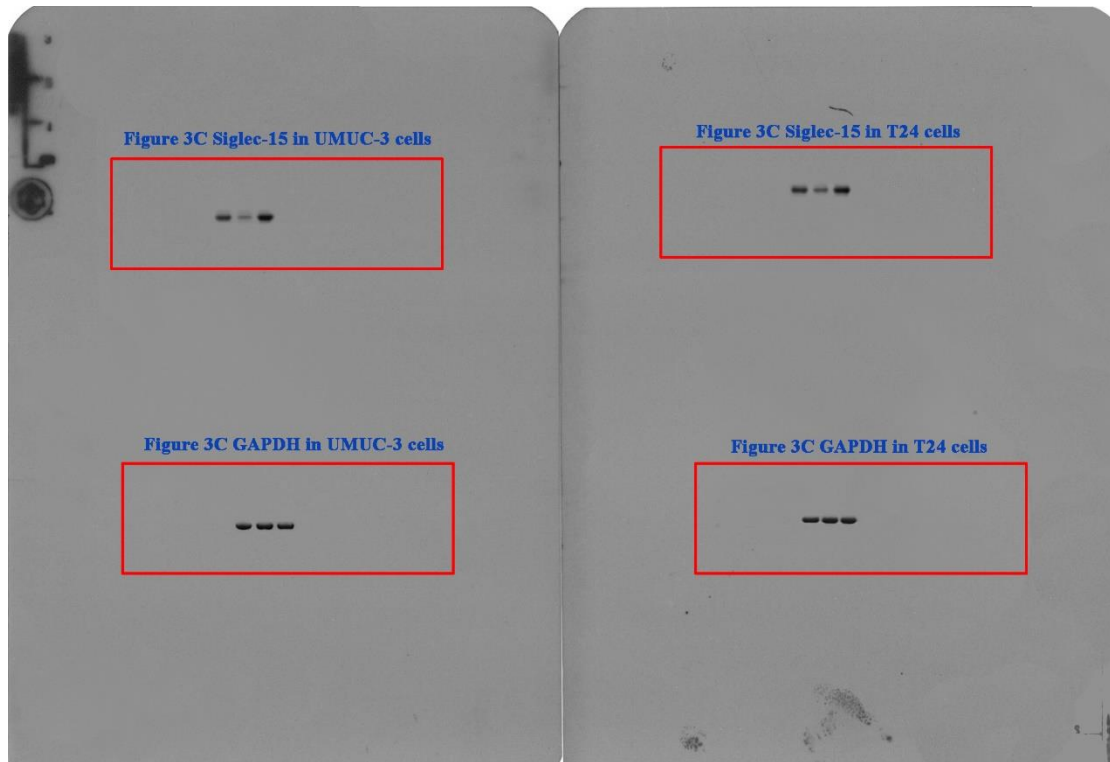

Figure 3C right panel

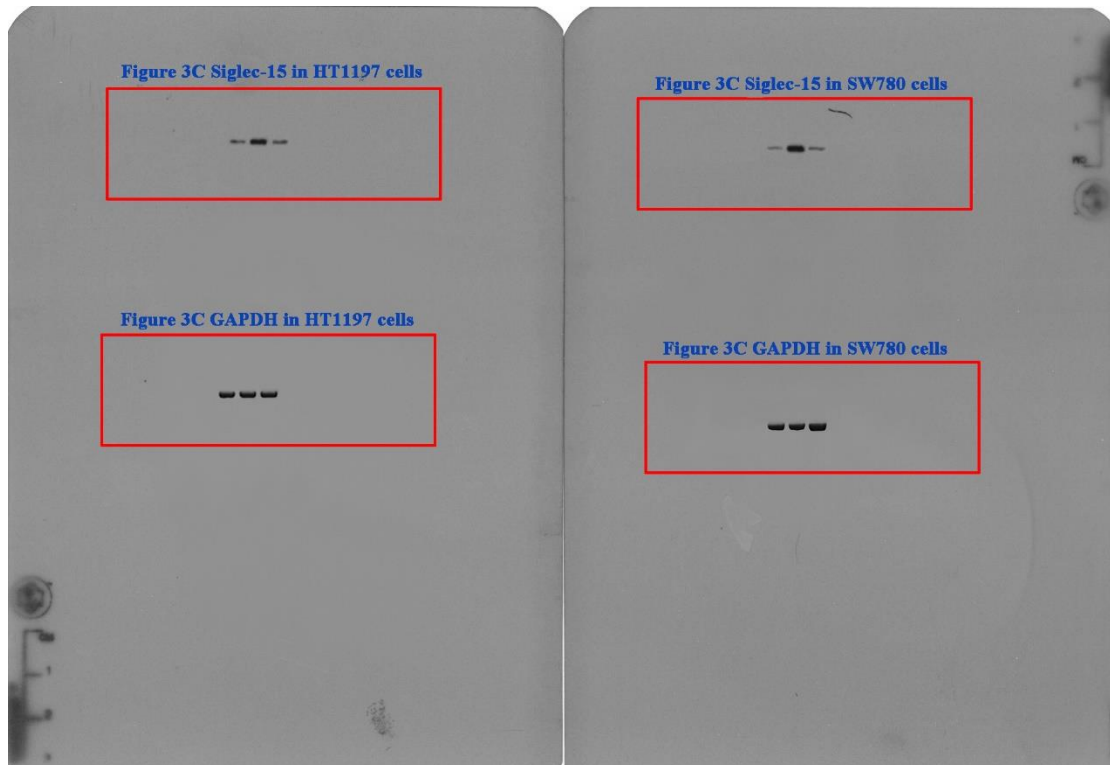

Figure 4E left panel

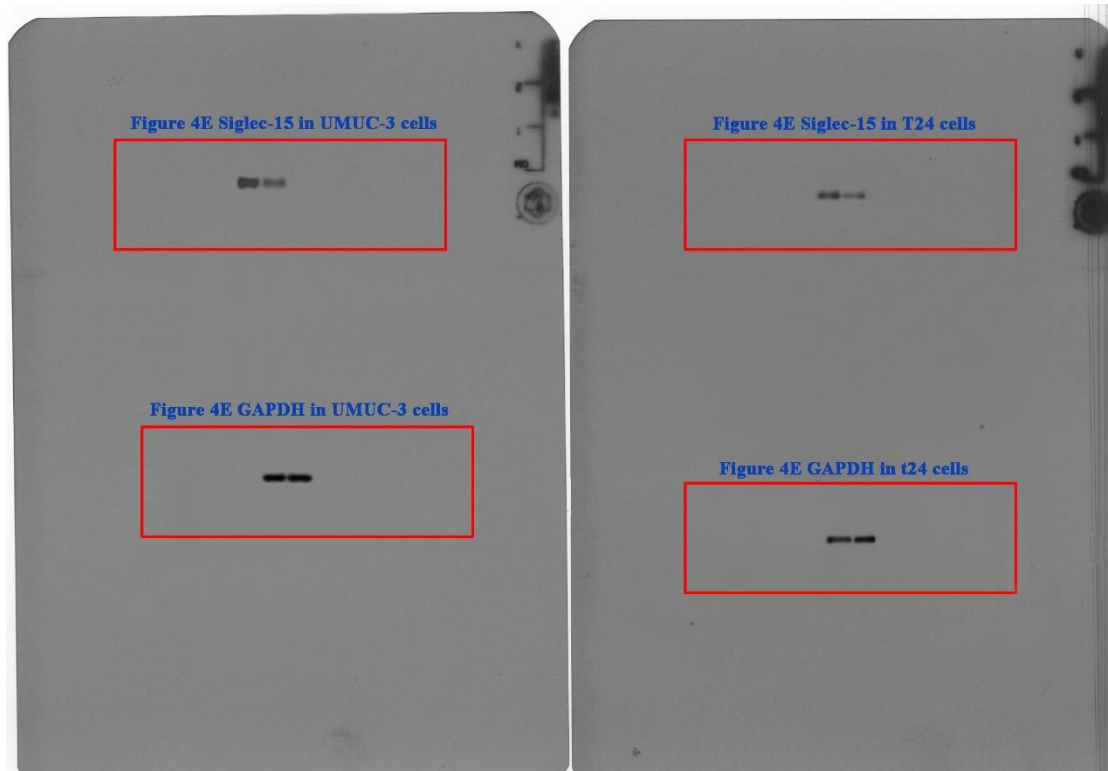

Figure 4E right panel

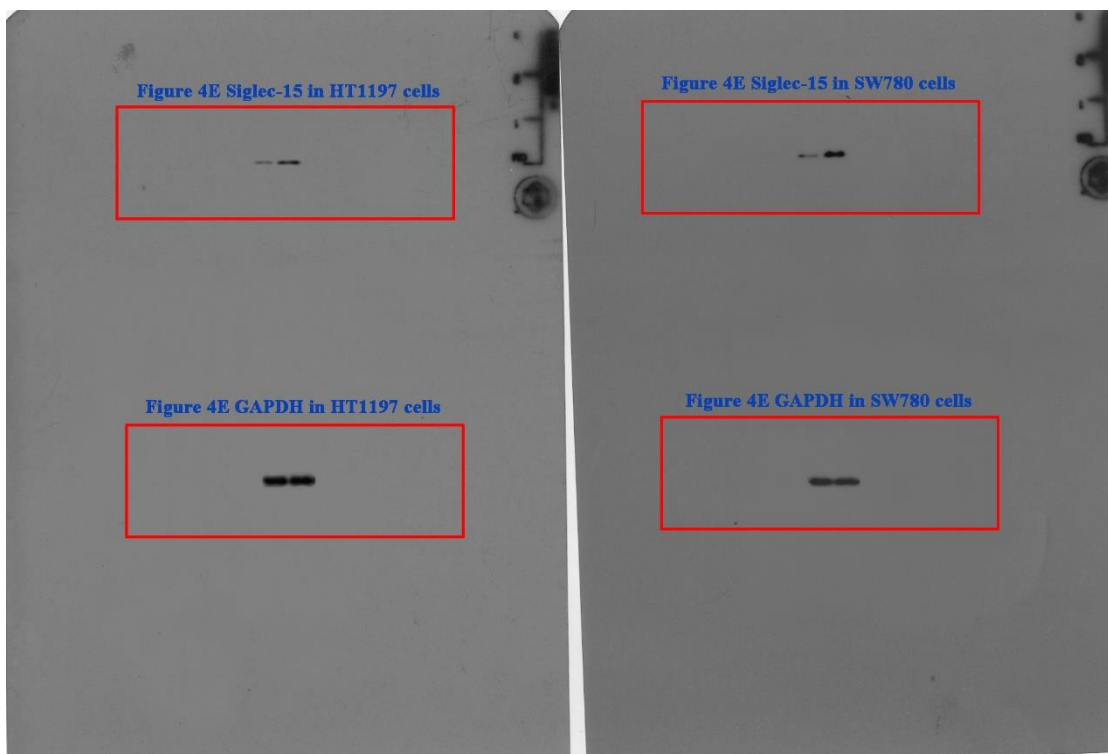

Figure 6C left panel

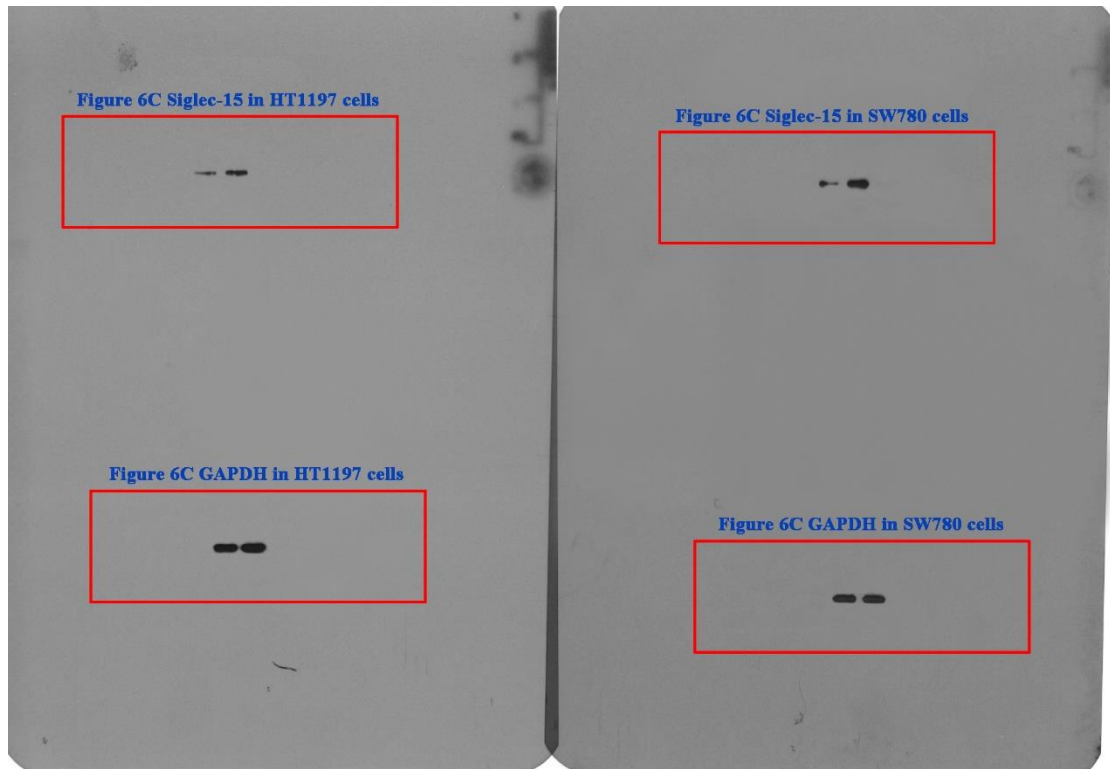

Figure 6C right panel

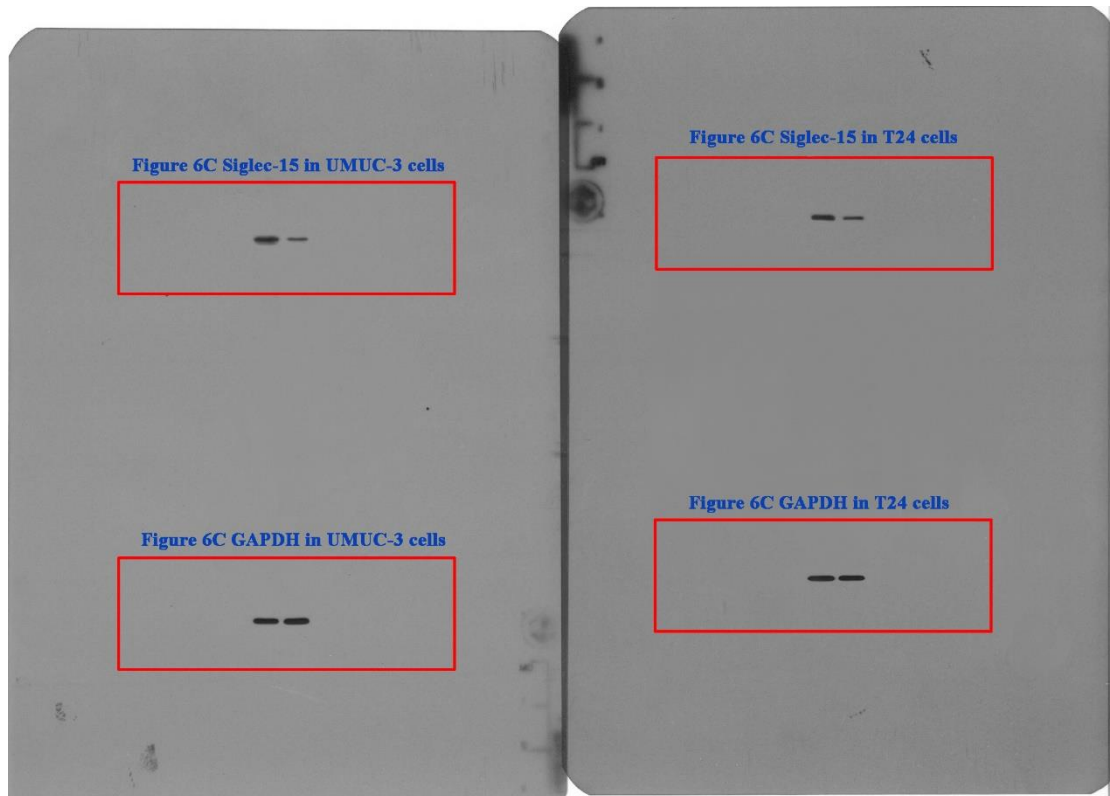

Supplement: MOESM2 [file 26840524]
